# Supplementary material for: Random acceleration and steered molecular dynamics simulations reveal the (un)binding tunnels in adenosine deaminase and critical residues in tunnels
Source: Royal Society of Chemistry journal article supplement (doi:10.1039/d0ra07796h), 2020-01-01

**Fig. S1** a. Three times SMD for PRH from T3, b. Three times SMD for PRH from T2, c. Three times SMD for PRH from T1 d. Three times SMD for FRK from T3, e. Three times SMD for FRK from T2, f. Three times SMD for FRK from T1

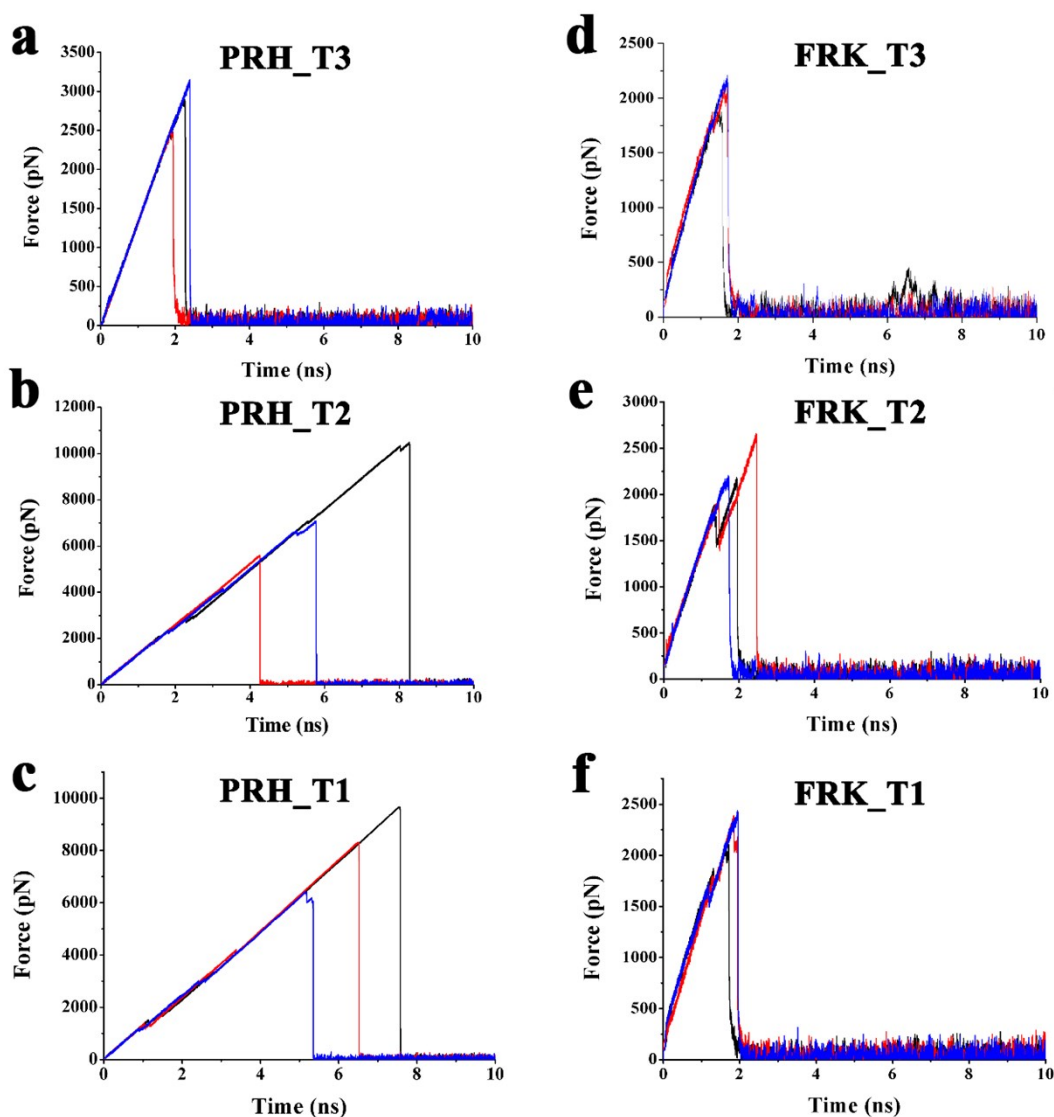

**Fig. S2** a Total energy for PRK from T1(black), T2(red), T3 (blue), b Total energy for FRK from T1(black), T2(red), T3 (blue)

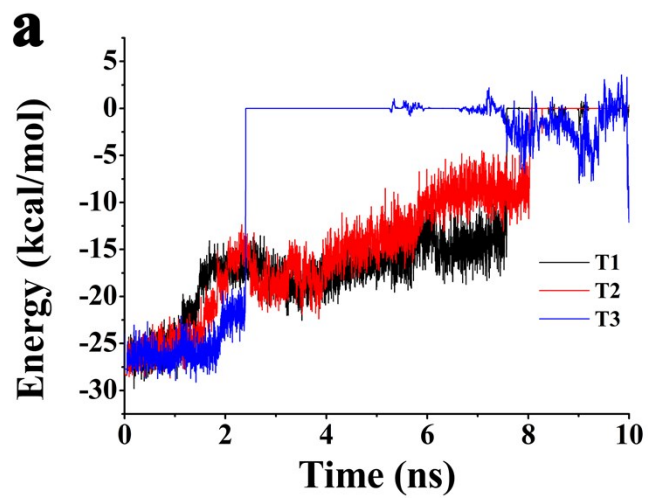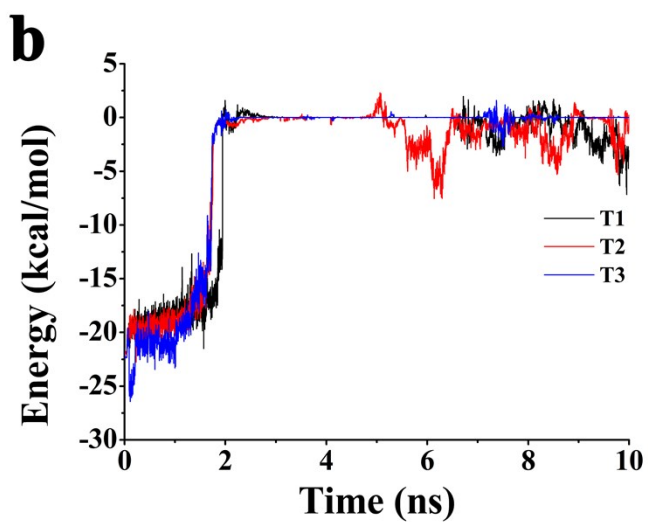





**Fig. S7** the active residues for FRK binding.

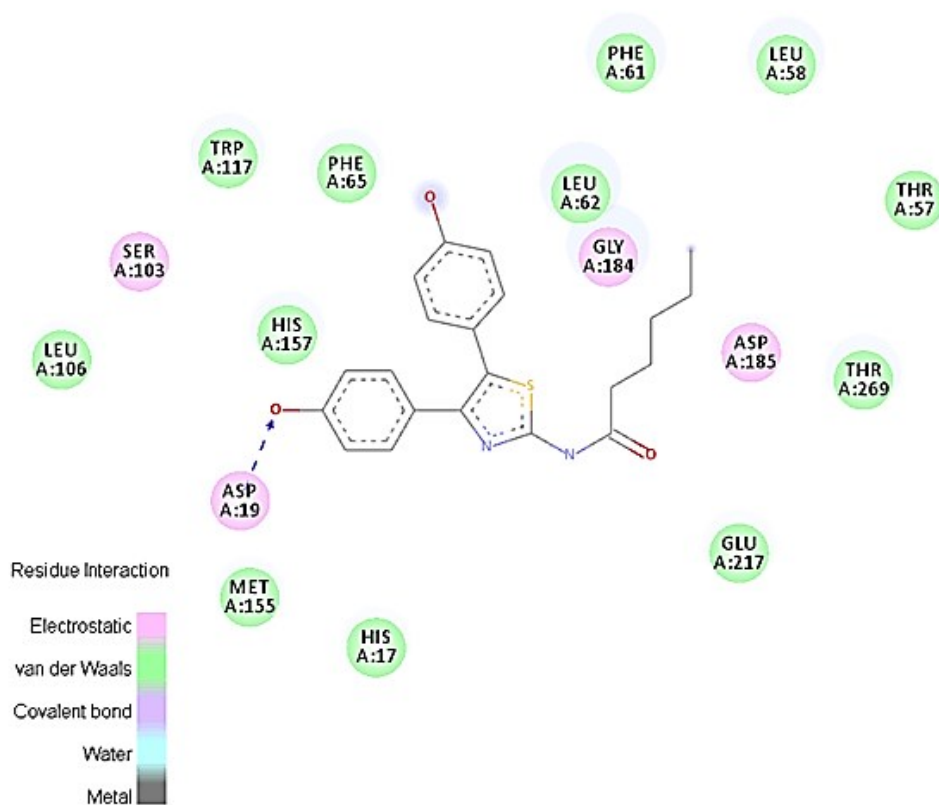

**Fig. S8** the residues located at the peak of FRK via T3.

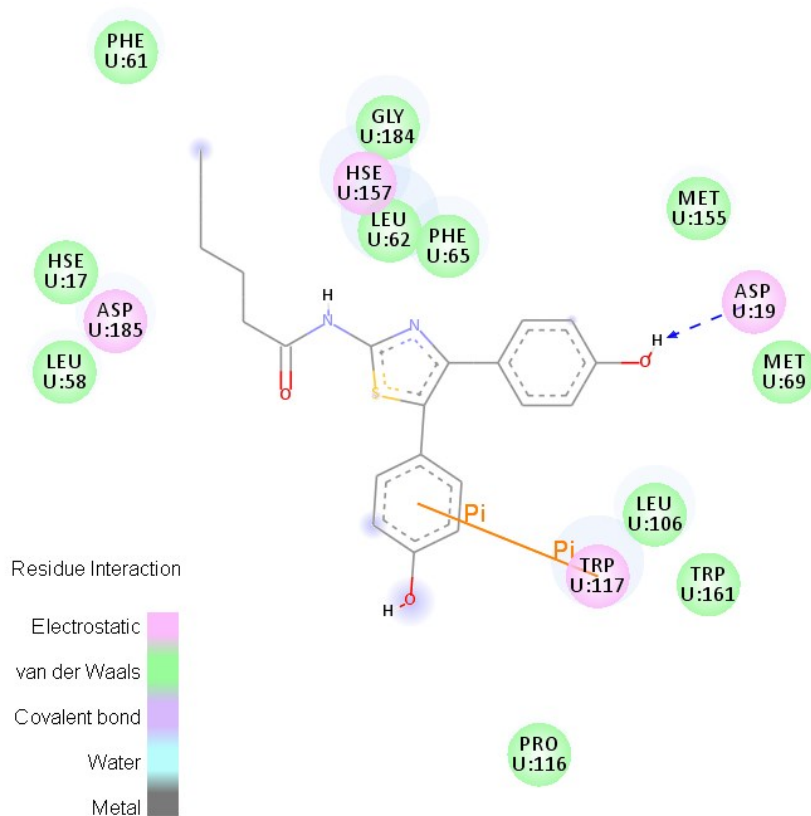

**Fig. S9** the residues located at the peak of FRK via T2.

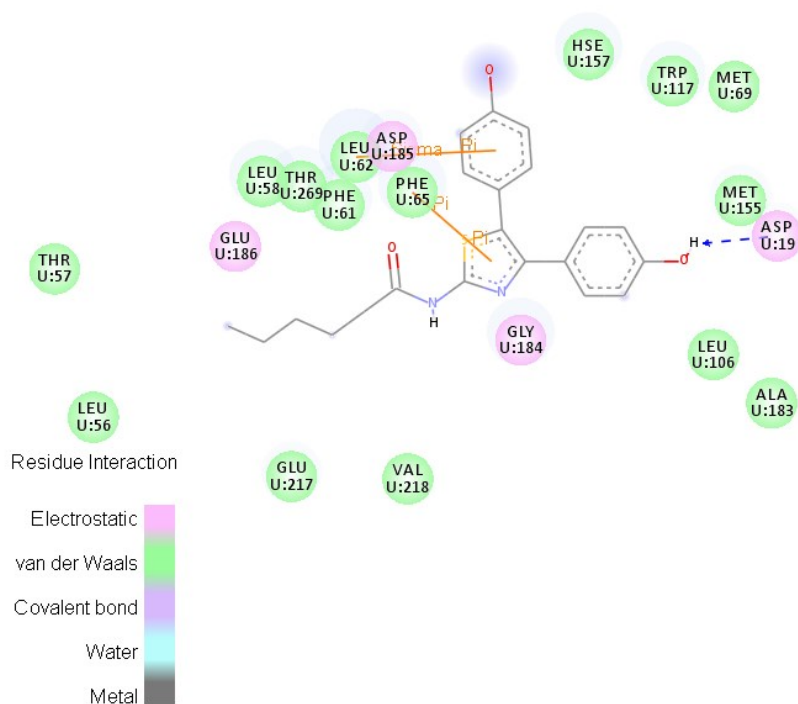

**Fig. S10** the residues located at the peak of FRK via T1.

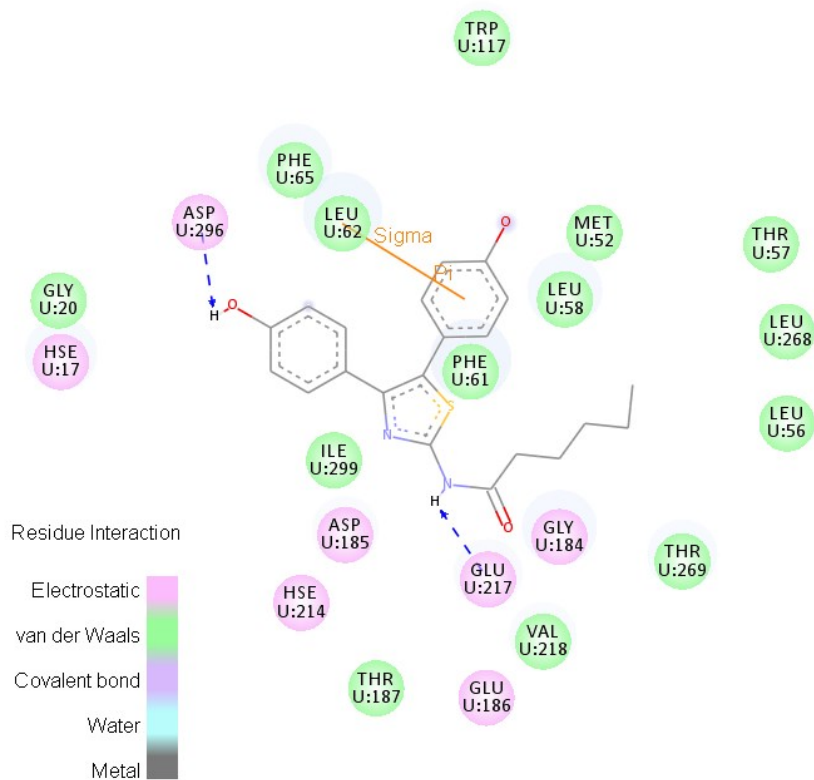

Supplement: d0ra07796h1.pdf [file d0ra07796h1.pdf]
